# Supplementary material for: Netrin-1 promotes diabetic corneal wound healing through molecular mechanisms mediated via the adenosine 2B receptor
Source: PubMed Central journal article supplement (PMC5902612; doi:10.1038/s41598-018-24506-9), 2018-04-16
Supplement: 41598_2018_24506_MOESM1_ESM.pdf [file 41598_2018_24506_MOESM1_ESM.pdf]

# **Netrin-1 promotes diabetic corneal wound healing through molecular mechanisms mediated via the adenosine 2B receptor**

Yangyang Zhang<sup>1,2</sup>, Peng Chen<sup>2</sup>, Guohu Di<sup>2</sup>, Xia Qi<sup>2</sup>, Qingjun Zhou<sup>2\*</sup>, Hua Gao<sup>2\*</sup>

1. School of Medicine and Life Sciences, University of Jinan-Shandong Academy of Medical Sciences, Jinan, China

2. State Key Laboratory Cultivation Base, Shandong Provincial Key Laboratory of Ophthalmology, Shandong Eye Institute, Shandong Academy of Medical Sciences, Qingdao, China.

**\*Correspondence author:** Hua Gao, M.D., Ph.D. & Qingjun Zhou, Ph.D.

Address: Shandong Eye Institute, 5 Yan'erdao Road, Qingdao, 266071, China.

Email: gaohua100@126.com & qjzhou2000@hotmail.com

Phone: 86-532-8589-9270

Fax: 86-532-8589-1110

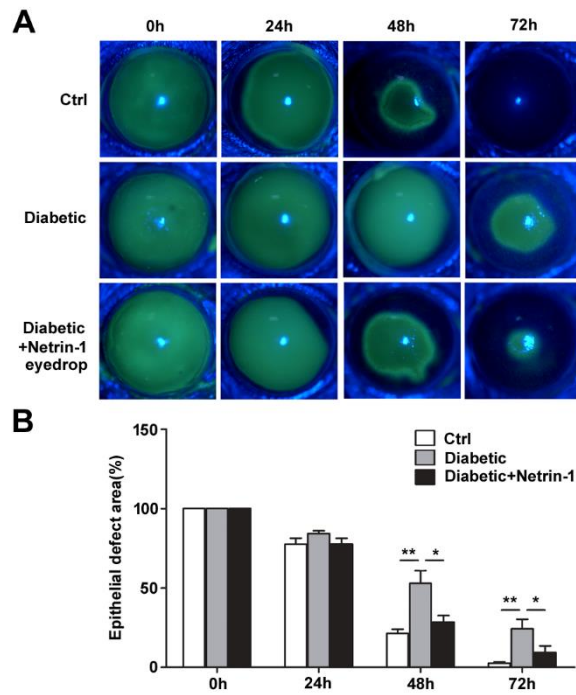

**Figure S1. Netrin-1 promotes corneal epithelial wound healing in normal mice.** Corneal epithelium was scraped in control mice with subconjunctival injection of equal PBS as vehicle control or netrin-1 (50 ng per eye). The corneal epithelial wound defect was stained with fluorescein sodium at 24, 48, and 72 h after epithelial scrape (A, 8 mice per group). The histogram of residual epithelial defect is presented as the percentage of the original wound area (B). \* $p < 0.05$ .

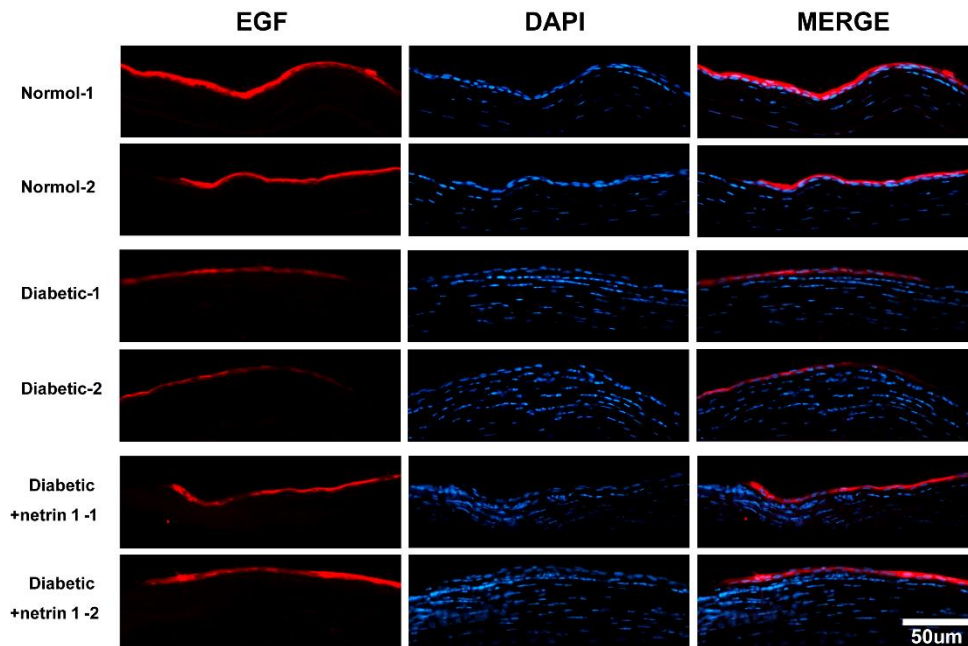

**Figure S2. Netrin-1 upregulates corneal EGF expression in diabetic mice.** The immunofluorescence staining results showed that the expression of EGF were decreased in diabetic mice compared to the normal mice at 48-hour post-wounded. The treatment of netrin-1 upregulated the EGF expression in diabetic mice. (3 mice per group)

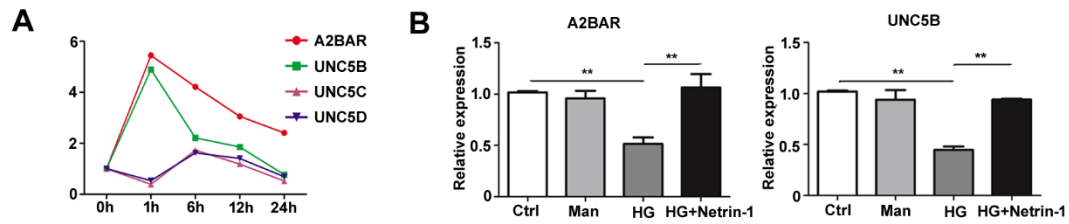

**Figure S3. Netrin-1 upregulates A2BAR and UNC5B expression in high glucose-treated corneal epithelial cells.** The mRNA expression of A2BAR and UNC5B were significantly up-regulated after the mouse corneal epithelial cells were wounded in normal conditions (A). Netrin-1 up-regulated the expression levels of these two receptors when compared to the high glucose-treated corneal epithelial cells and recovered the same levels as that of control or mannose osmotic control cells (B), \* $p < 0.05$ , \*\* $p < 0.01$ .
